# Supplementary material
Source: HighWire-hosted journal article supplement (http://www.qdcxjkg.com/highwire/filestream/113792/field_highwire_adjunct_files/0/ERJ-00194-2012_Disclosures.pdf)
Supplement: ERJ-00194-2012_Disclosures.pdf [file ERJ-00194-2012_Disclosures.pdf]

D.S. Postma received an unrestricted educational grant for research from AstraZeneca, Chiesi and GSK. Travel to the ERS or ATS has been partially funded by AstraZeneca, Chiesi, GSK and Nycomed. Fees for consulting were paid to the University by AstraZeneca, Chiesi, GSK, Nycomed and TEVA.
